# Supplementary material
Source: ML conference proceedings conference paper supplement (https://openaccess.thecvf.com/content/CVPR2024/html/Xu_MuRF_Multi-Baseline_Radiance_CVPR_2024_paper.html)
Supplement: Supplementary file 1 [file Xu_MuRF_Multi-Baseline_Radiance_CVPR_2024_supplemental.pdf]

# MuRF: Multi-Baseline Radiance Fields

## Supplementary Material

Haofei Xu<sup>1,2</sup> Anpei Chen<sup>1,2</sup> Yuedong Chen<sup>3</sup> Christos Sakaridis<sup>1</sup> Yulun Zhang<sup>4</sup>  
Marc Pollefeys<sup>1,5</sup> Andreas Geiger<sup>2,†</sup> Fisher Yu<sup>1,†</sup>

<sup>1</sup>ETH Zurich <sup>2</sup>University of Tübingen, Tübingen AI Center <sup>3</sup>Monash University

<sup>4</sup>Shanghai Jiao Tong University <sup>5</sup>Microsoft <sup>†</sup>Joint last author

In this document, we provide high-resolution rendering results, more visual results and more implementation details. We invite the readers to our project page <https://haofeixu.github.io/murf/> for more video results.

### A. High-Resolution Rendering

Our MuRF is developed with the target view frustum volume representation. The volume resolution of the coarse model is  $\frac{H}{8} \times \frac{W}{8} \times D_1 \times C_1$ , and the fine model is  $H \times W \times D_2 \times C_2$  for  $H \times W$  image resolution to render, where  $D_1 = 64$  and  $D_2 = 16$  are the numbers of sampling points on each ray, and  $C_1 = 128$  and  $C_2 = 16$  are the volume’s feature dimensions. Such resolutions are usually acceptable for typical image resolutions (e.g.,  $512 \times 512$ ) on general hardware. Should the memory consumption become a bottleneck for high-resolution images, we can always switch to the patch-based rendering strategy. More specifically, we first split the volume’s first two spatial dimensions to a total number of  $P \times P$  overlapping patches, and then render each patch independently. Finally, we merge all the patch results to a full image, where the overlapping regions are combined with simple averaging. Such a patch-based rendering strategy enables our method to scale to virtually arbitrary image resolutions.

In Fig. B, we show  $1536 \times 2048$  resolution rendering results on the LLFF [6] dataset, where the results are obtained by splitting the full resolution volume to 16 ( $4 \times 4$ ) overlapping patches.

### B. More Visual Results

**Geometry Visualization.** In Fig. A, we show the rendered depth and normal maps from our model, which indicates that our model learned 3D concepts from pure RGB images.

**Different Camera Baselines.** In Fig. C, we show the visual comparison results with previous state-of-the-art small

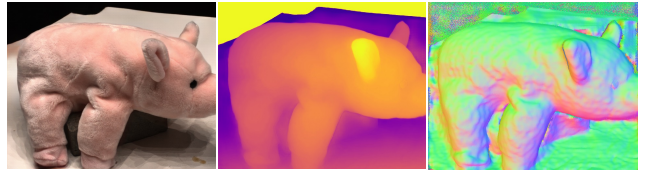

Figure A. Rendered image, depth and normal from 3 views.

baseline method ENeRF [5] on the DTU dataset. Our MuRF consistently outperforms ENeRF in different baselines, and the performance gap becomes larger for larger baselines. In Fig. D, we show the visual comparison results with previous state-of-the-art larger baseline method AttnRender [3] on the RealEstate10K [10] dataset. Our MuRF consistently outperforms AttnRender in different baselines. Our method also gains larger improvement for smaller baselines than AttnRender, and our renderings are sharper, while AttnRender’s results tend to be blurry.

**Cross-Dataset Generalization.** In Fig. E, we show the cross-dataset generalization results on DTU [4] and Mip-NeRF 360 [1] dataset with the model trained on RealEstate10K [10]. Our MuRF outperforms AttnRender [3] by significant margins.

### C. More Implementation Details

Following MatchNeRF [2], we initialize our multi-view Transformer encoder with GMFlow [9] pre-trained weights. The learning rates of the image encoder and the radiance field decoder are  $5 \times 10^{-5}$  and  $5 \times 10^{-4}$ , respectively. The details on each specific experiment are presented below. We will release all the code and models to ease reproduction.

**DTU.** The image resolution of the DTU dataset is  $512 \times 640$ . We train our coarse model for 20 epochs on eight RTX A6000 GPUs with a random crop size of  $384 \times 512$ . The batch size is 8. The performance of the coarse model on the DTU test set is PSNR: 27.19, SSIM: 0.925, LPIPS: 0.120. We then train the fine model with the coarse model frozen. The fine model is trained for 12 epochs with a random crop

size of  $256 \times 384$ , and the batch size is 8.

**RealEstate10K.** We use the image resolution of  $256 \times 256$  on the RealEstate10K dataset following AttnRend [3]. For this resolution, we use  $4\times$  subsampling when constructing the volume and no additional hierarchical sampling is used. We train the model for 50 epochs on three A100 GPUs with a random crop size of  $224 \times 224$ , and the batch size is 6.

**LLFF.** The testing image resolution of the LLFF [6] dataset is  $756 \times 1008$ , and the training data consists of several mixed datasets following previous works [7, 8]. We train models with different numbers (2, 6, and 10) of input views to compare with previous methods. The 2-view model is trained with a random crop size of  $384 \times 512$ , and the 6-view and 10-view models are trained with  $256 \times 384$  random crops. The 2-view and 6-view models are trained on eight RTX A6000 GPUs, and the 10-view model is trained on two A100 GPUs.

**Ablations.** For ablation experiments on the DTU and RealEstate10K datasets in the main paper, we only train the coarse models without the hierarchical sampling. All ablations are trained two RTX 3090 GPUs. The DTU models are trained for 20 epochs with a random crop size of  $256 \times 416$ , and the RealEstate10K models are trained for 80 epochs with the full  $256 \times 256$  resolution.

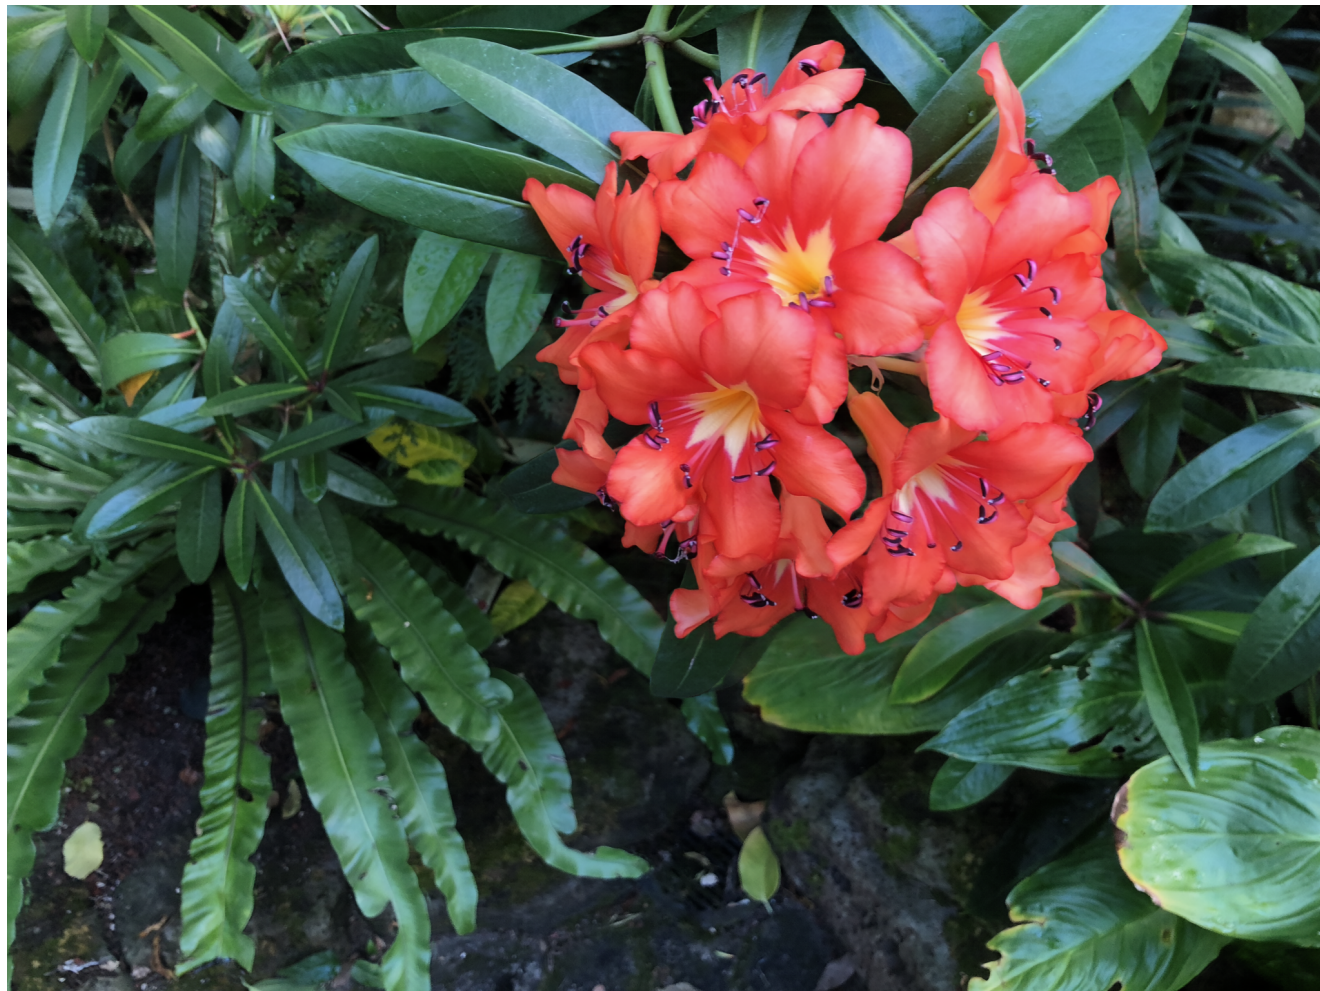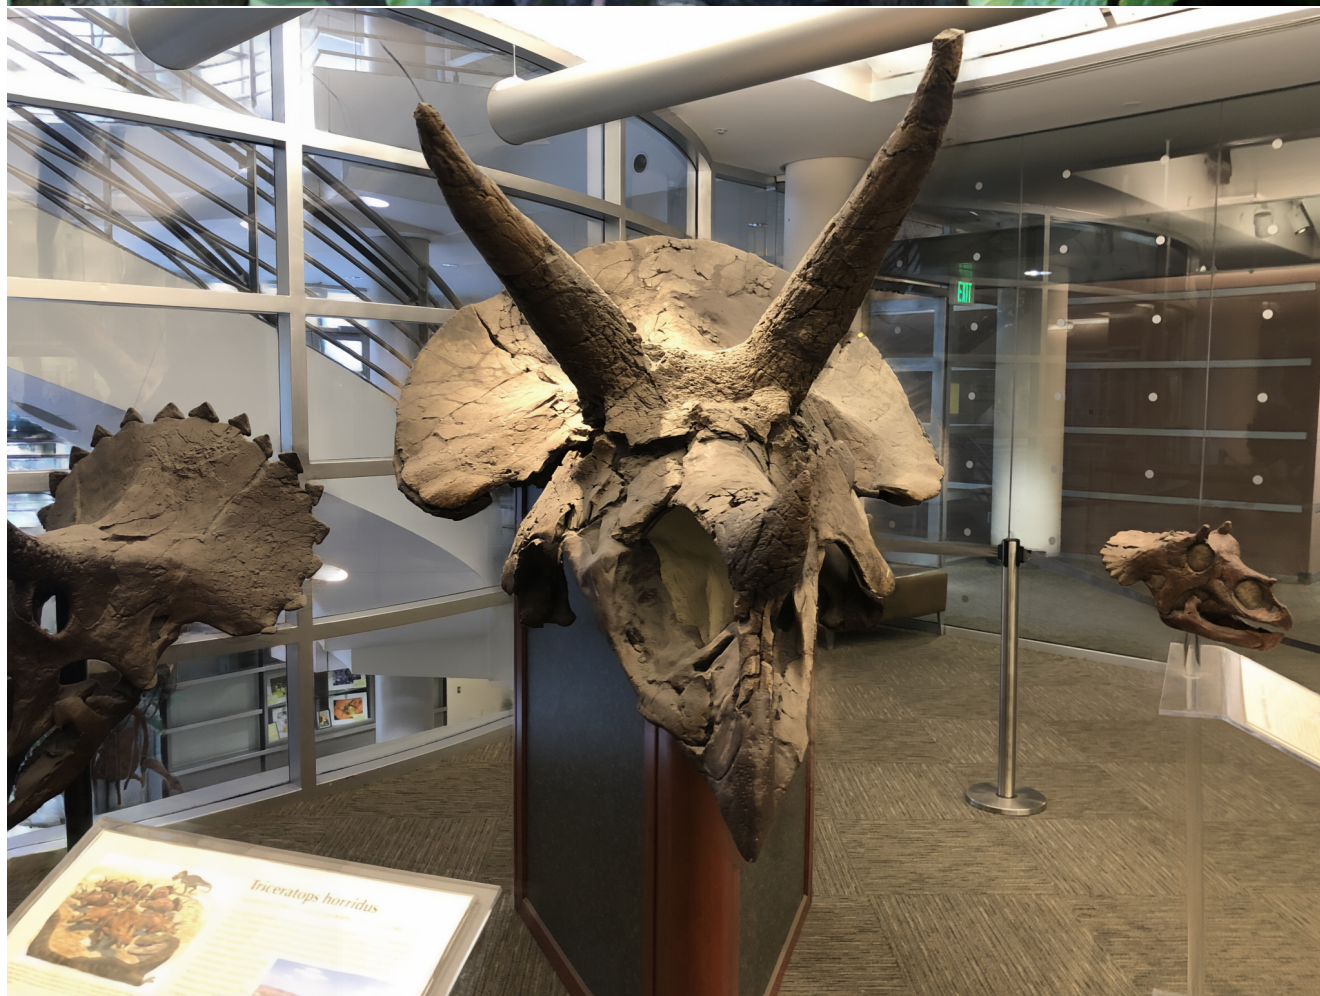

Figure B. 1536  $\times$  2048 resolution renderings on the LLFF dataset.

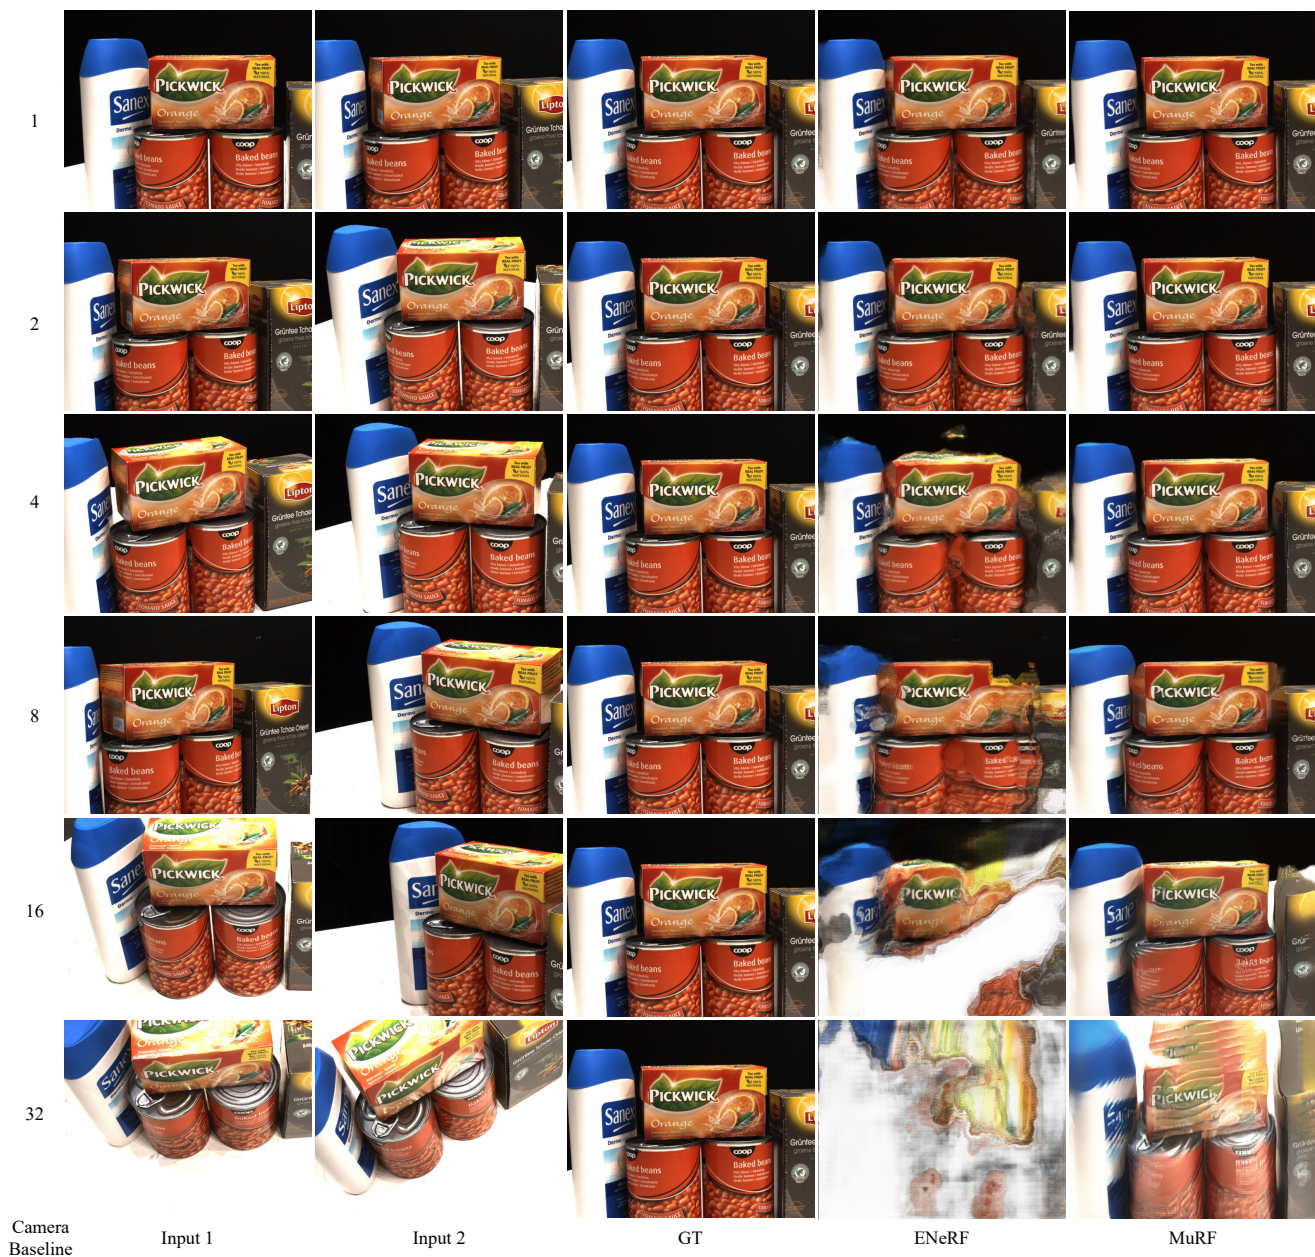

Figure C. **Results of different camera baselines on DTU.** Our MuRF consistently outperforms previous state-of-the-art small baseline method ENeRF [5], and the performance gap becomes larger for larger baselines.

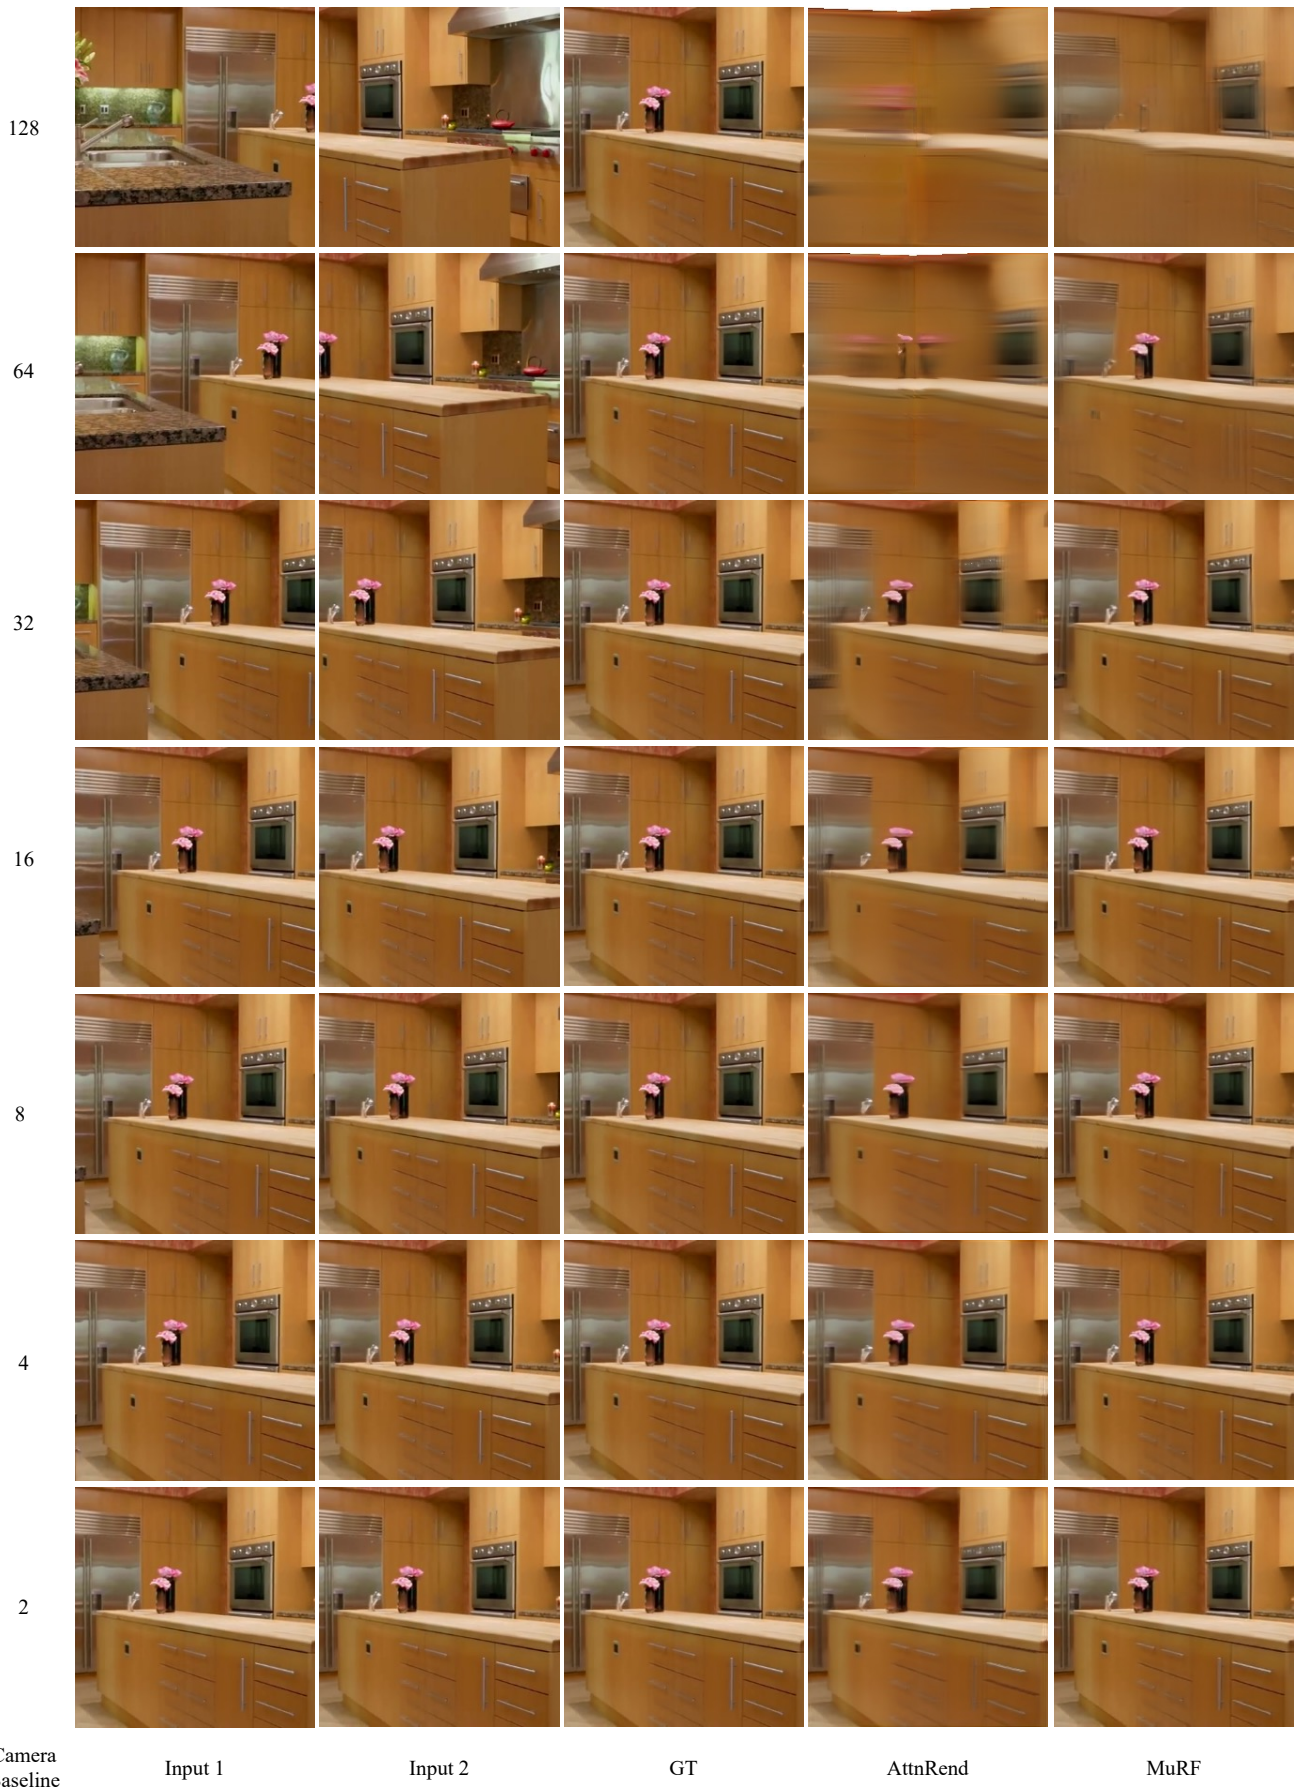

Figure D. **Results of different camera baselines on RealEstate10K.** Our MuRF consistently outperforms previous state-of-the-art large baseline method AttnRend [3], and our method gains larger improvement for smaller baselines than AttnRend.

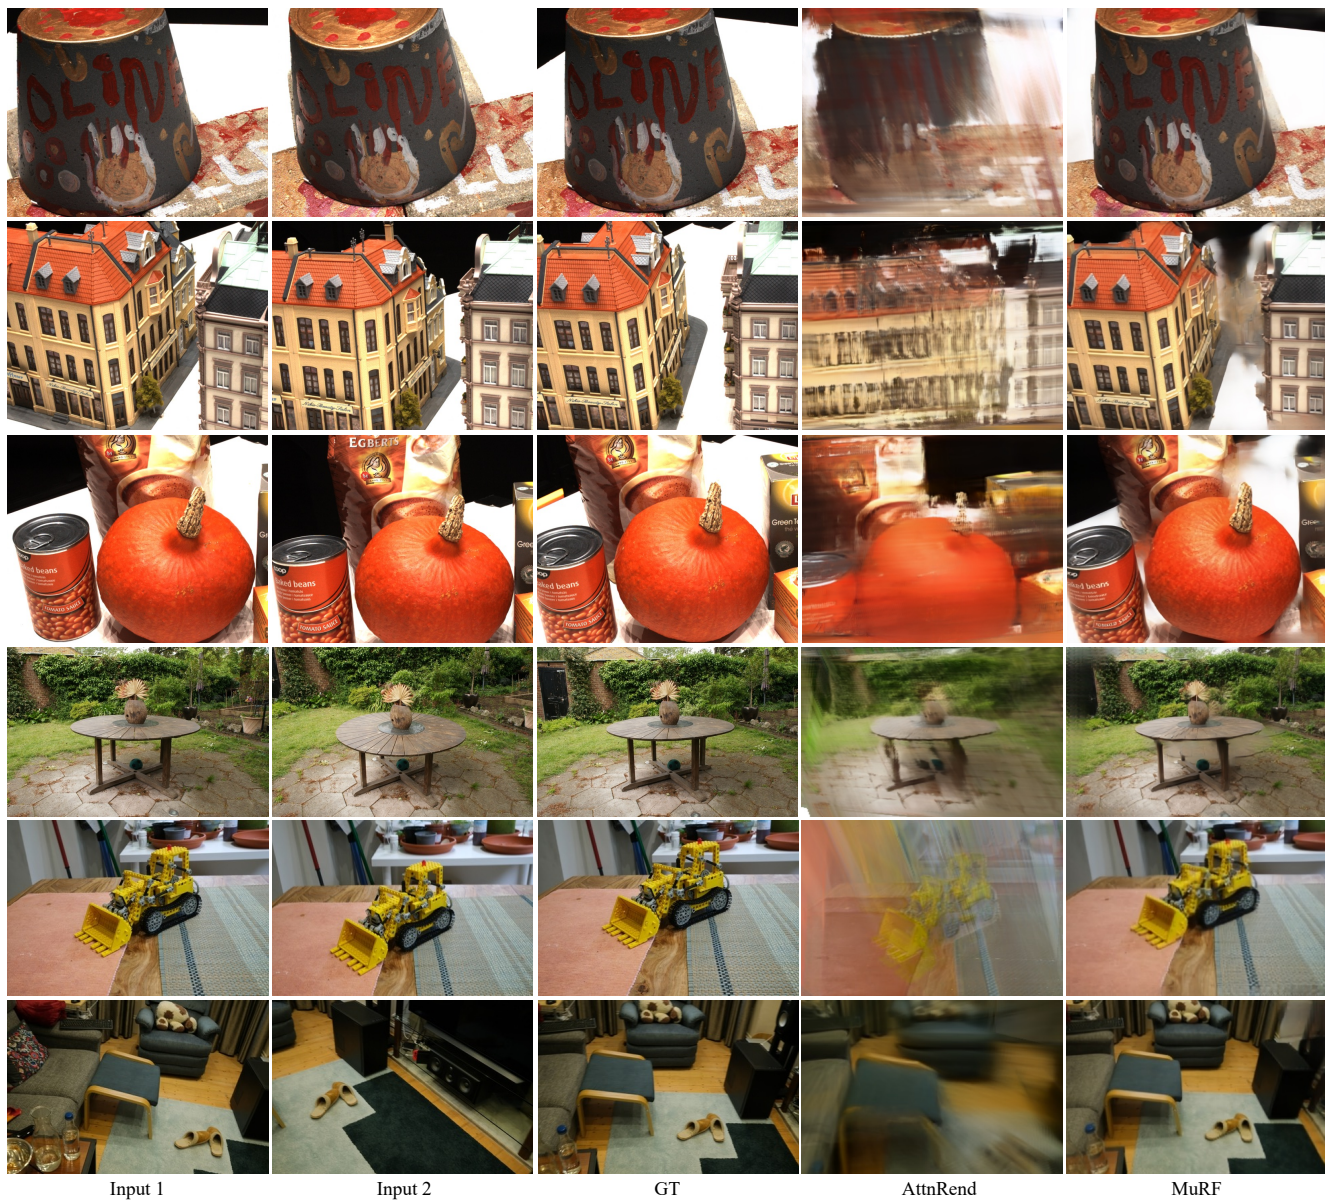

Figure E. Generalization on DTU and Mip-NeRF 360 dataset with the model trained on RealEstate10K.

## References

- [1] Jonathan T Barron, Ben Mildenhall, Dor Verbin, Pratul P Srinivasan, and Peter Hedman. Mip-nerf 360: Unbounded anti-aliased neural radiance fields. In *CVPR*, 2022. 1
- [2] Yuedong Chen, Haofei Xu, Qianyi Wu, Chuanxia Zheng, Tat-Jen Cham, and Jianfei Cai. Explicit correspondence matching for generalizable neural radiance fields. In *arXiv*, 2023. 1
- [3] Yilun Du, Cameron Smith, Ayush Tewari, and Vincent Sitzmann. Learning to render novel views from wide-baseline stereo pairs. In *CVPR*, 2023. 1, 2, 5
- [4] Rasmus Jensen, Anders Dahl, George Vogiatzis, Engin Tola, and Henrik Aanæs. Large scale multi-view stereopsis evaluation. In *CVPR*, 2014. 1
- [5] Haotong Lin, Sida Peng, Zhen Xu, Yunzhi Yan, Qing Shuai, Hujun Bao, and Xiaowei Zhou. Efficient neural radiance fields for interactive free-viewpoint video. In *SIGGRAPH Asia 2022 Conference Papers*, pages 1–9, 2022. 1, 4
- [6] Ben Mildenhall, Pratul P Srinivasan, Matthew Tancik, Jonathan T Barron, Ravi Ramamoorthi, and Ren Ng. Nerf: Representing scenes as neural radiance fields for view synthesis. In *ECCV*, 2020. 1, 2
- [7] Mohammed Suhail, Carlos Esteves, Leonid Sigal, and Ameesh Makadia. Generalizable patch-based neural rendering. In *ECCV*. Springer, 2022. 2
- [8] Qianqian Wang, Zhicheng Wang, Kyle Genova, Pratul P Srinivasan, Howard Zhou, Jonathan T Barron, Ricardo Martin-Brualla, Noah Snavely, and Thomas Funkhouser. Ibrnet: Learning multi-view image-based rendering. In *CVPR*, 2021. 2
- [9] Haofei Xu, Jing Zhang, Jianfei Cai, Hamid Rezatofighi, and Dacheng Tao. Gmflow: Learning optical flow via global matching. In *CVPR*, 2022. 1
- [10] Tinghui Zhou, Richard Tucker, John Flynn, Graham Fyffe, and Noah Snavely. Stereo magnification: learning view synthesis using multiplane images. *ACM Trans. Graph.*, 37(4): 65, 2018. 1
